# Supplementary material for: Exponential growth of layer-by-layer assembled coatings with well-dispersed ultrafine nanofillers: a facile route to scratch-resistant and transparent hybrid coatings
Source: Royal Society of Chemistry journal article supplement (doi:10.1039/c0jm00900h), 2010-01-01
Supplement: c0jm00900h.pdf [file c0jm00900h.pdf]

**Exponential growth of layer-by-layer assembled coatings with well-dispersed  
ultrafine nanofillers: a facile route to scratch-resistant and transparent hybrid  
coatings**

Xiaokong Liu,<sup>a</sup> Lu Zhou,<sup>a</sup> Feng Liu,<sup>a</sup> Mingyang Ji,<sup>a</sup> Wenge Tang,<sup>b</sup> Meijuan Pang,<sup>b</sup>  
and Junqi Sun<sup>\*a</sup>

<sup>a</sup>State Key Laboratory of Supramolecular Structure and Materials, College of  
Chemistry, Jilin University, Changchun 130012, P. R. China.

E-mail: sun\_junqi@jlu.edu.cn.; Fax: 0086-431-85193421; Tel: 0086-431-85168723

<sup>b</sup>National Center of Quality Supervision and Inspect of Automobile Spare Parts,  
Changchun 130012, P. R. China.

\*To whom correspondence should be addressed. Fax: 0086-431-85193421. E-mail:  
sun\_junqi@jlu.edu.cn.

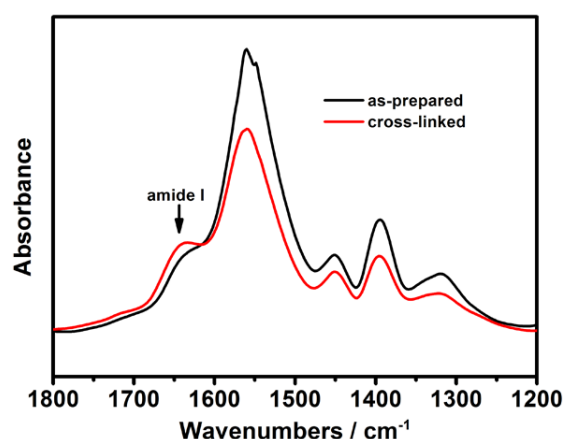

**Figure S1.** FT-IR absorbance spectra of the as-prepared (black line) and thermally cross-linked (red line) (PAA-CaCO<sub>3</sub>/PAH)\*30 coatings. The appearance of the amine I peak at ~1640 cm<sup>-1</sup> in the FT-IR spectrum of the thermally cross-linked (PAA-CaCO<sub>3</sub>/PAH)\*30 coating confirms the formation of amide bonds between the amine groups of PAH and the acid groups of PAA.

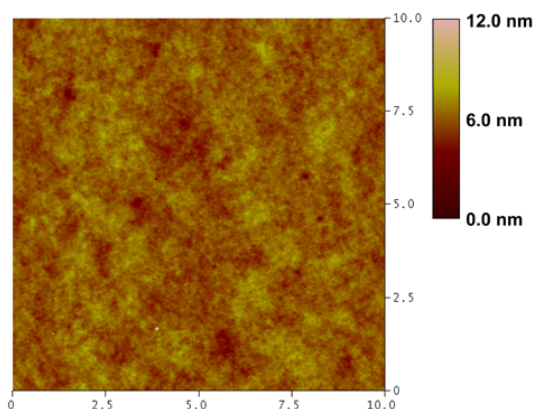

**Figure S2.** AFM image of the cross-linked (PAA-CaCO<sub>3</sub>/PAH)\*20 coating. The coating has a root-mean-square (rms) roughness of 0.8 nm as measured by atomic force microscopy.

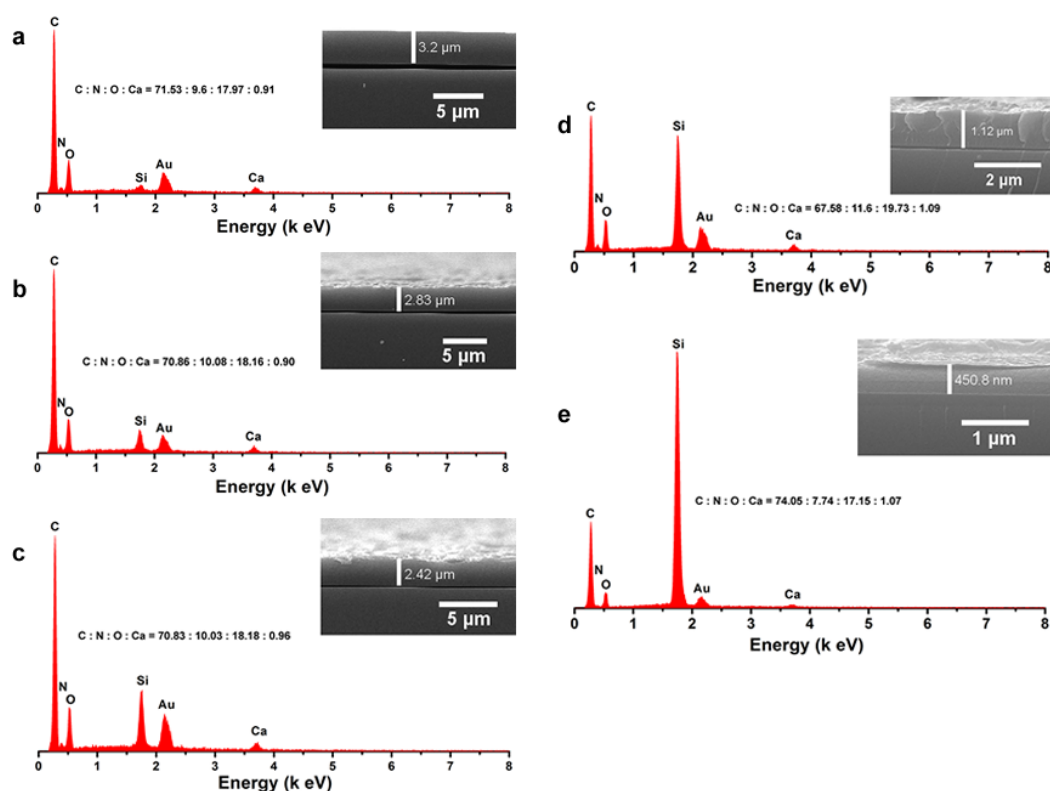

**Figure S3.** The energy dispersive X-ray (EDX) spectra of a thermally cross-linked (PAA-CaCO<sub>3</sub>/PAH)\*30 coating which was scratched with a sharp scalpel to different depth. a) Before scratching, b-e) The (PAA-CaCO<sub>3</sub>/PAH)\*30 coatings with a residual thickness of 2.83  $\mu\text{m}$  (b), 2.42  $\mu\text{m}$  (c), 1.12  $\mu\text{m}$  (d) and 0.45  $\mu\text{m}$  (e).

The energy dispersive X-ray analysis (EDX) has a deep depth detection which allows to identifying element distribution in the whole (PAA-CaCO<sub>3</sub>/PAH)\*30 coating, as the Si signal from the underlying silicon substrate is detected for the 3.2- $\mu\text{m}$ -thick (PAA-CaCO<sub>3</sub>/PAH)\*30 coating. With more layers being removed from

(PAA-CaCO<sub>3</sub>/PAH)\*30 coating, the intensity of Si signal in the corresponding EDX spectra increases gradually. The constant ratio of Ca to C, N and O in the coatings confirms the homogeneous dispersing of CaCO<sub>3</sub> in the normal direction of the (PAA-CaCO<sub>3</sub>/PAH)\*30 coating.

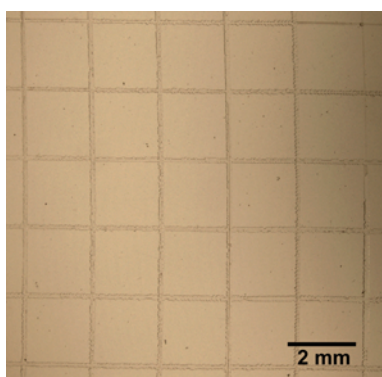

**Figure S4.** Optical image of a thermally cross-linked (PAA-CaCO<sub>3</sub>/PAH)\*20 coating deposited on a glass substrate after adhesion test. The (PAA-CaCO<sub>3</sub>/PAH)\*20 has a ASTM class 5B adhesion with the underlying glass substrate, which represents the highest level of adhesion.

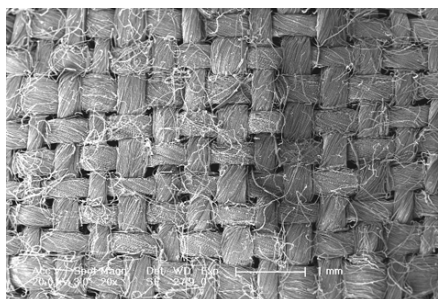

**Figure S5.** Top-view SEM image of the piece of ramee cloth used in the rubbing test.
